# Supplementary material
Source: PubMed Central journal article supplement (PMC8792296)
Supplement: NIHMS1763791-supplement-Supplemental_Publication_Material.pdf [file NIHMS1763791-supplement-Supplemental_Publication_Material.pdf]

## SUPPLEMENTAL MATERIALS

**Supplementary Table 1.** Unadjusted incidence rates of atherosclerotic cardiovascular disease and all-cause mortality among those with CAC=0 at baseline (median follow up time 15.9 years) stratified by ASCVD risk

| Estimated<br>ASCVD risk           | ASCVD |           |          | All-Cause Mortality |           |          |
|-----------------------------------|-------|-----------|----------|---------------------|-----------|----------|
|                                   | <7.5% | 7.5%–<15% | 15%–<20% | <7.5%               | 7.5%–<15% | 15%–<20% |
| Cigarette smoking status          |       |           |          |                     |           |          |
| Never                             | 2.02  | 5.08      | 2.73     | 3.30                | 10.59     | 15.00    |
| Former                            | 2.17  | 4.79      | 6.85     | 3.28                | 11.16     | 20.14    |
| Current                           | 2.25  | 11.41     | 14.64    | 6.99                | 14.41     | 15.31    |
| Diabetes mellitus                 |       |           |          |                     |           |          |
| No                                | 2.05  | 6.11      | 4.04     | 3.66                | 11.84     | 16.17    |
| Yes                               | 3.31  | 6.84      | 16.56    | 3.97                | 8.79      | 20.37    |
| Hypertension                      |       |           |          |                     |           |          |
| No                                | 1.91  | 6.16      | 2.42     | 3.20                | 14.39     | 13.91    |
| Yes                               | 2.49  | 6.20      | 6.44     | 4.68                | 10.20     | 17.29    |
| Aspirin use                       |       |           |          |                     |           |          |
| No                                | 2.06  | 6.03      | 5.98     | 3.53                | 11.32     | 16.46    |
| Yes                               | 3.22  | 7.34      | 5.83     | 4.00                | 11.65     | 19.16    |
| Statin use                        |       |           |          |                     |           |          |
| No                                | 2.04  | 6.25      | 5.18     | 3.62                | 11.54     | 17.46    |
| Yes                               | 2.78  | 4.74      | 8.85     | 4.41                | 11.36     | 14.68    |
| Increased waist circumference     |       |           |          |                     |           |          |
| No                                | 1.77  | 5.67      | 5.18     | 2.75                | 11.12     | 21.95    |
| Yes                               | 2.19  | 6.27      | 8.85     | 3.94                | 11.57     | 16.06    |
| Family history of premature ASCVD |       |           |          |                     |           |          |

|                                |      |      |      |      |       |       |
|--------------------------------|------|------|------|------|-------|-------|
| No                             | 1.82 | 6.16 | 4.91 | 3.56 | 10.36 | 16.11 |
| Yes                            | 3.37 | 7.36 | 8.10 | 2.34 | 13.91 | 12.45 |
| Chronic kidney disease         |      |      |      |      |       |       |
| No                             | 1.92 | 6.42 | 6.03 | 3.56 | 10.48 | 17.59 |
| Yes                            | 3.95 | 4.88 | 5.40 | 4.85 | 17.42 | 14.67 |
| HDL-C $\leq$ 50 mg/dL          |      |      |      |      |       |       |
| No                             | 1.96 | 5.45 | 5.54 | 4.09 | 12.34 | 13.07 |
| Yes                            | 2.23 | 6.72 | 6.12 | 3.20 | 10.91 | 19.75 |
| Triglycerides $\geq$ 150 mg/dL |      |      |      |      |       |       |
| No                             | 2.00 | 5.71 | 6.51 | 3.77 | 11.46 | 16.53 |
| Yes                            | 2.35 | 7.32 | 4.46 | 3.35 | 11.63 | 17.50 |
| LDL-C $\geq$ 130 mg/dL         |      |      |      |      |       |       |
| No                             | 2.05 | 6.48 | 7.92 | 3.94 | 13.19 | 17.50 |
| Yes                            | 2.17 | 5.64 | 1.14 | 3.05 | 8.42  | 15.20 |
| Lp(a) $\geq$ 50 mg/dL          |      |      |      |      |       |       |
| No                             | 1.95 | 6.73 | 5.18 | 3.83 | 12.06 | 18.93 |
| Yes                            | 2.68 | 4.57 | 7.77 | 3.00 | 9.89  | 10.91 |
| hsCRP $\geq$ 2 mg/L            |      |      |      |      |       |       |
| No                             | 1.79 | 5.28 | 8.39 | 2.84 | 11.01 | 17.23 |
| Yes                            | 2.43 | 6.99 | 3.41 | 4.62 | 11.95 | 16.43 |

Abbreviations: CHD (coronary heart disease); HDL-C (high-density lipoprotein cholesterol); LDL-C (low-density lipoprotein cholesterol); Lp(a) (lipoprotein (a)); hsCRP (high-sensitivity C-reactive protein).

Increased waist circumference is defined as  $\geq$ 90 cm for men or  $\geq$ 80 cm for women



|                                |      |      |      |       |      |       |       |       |
|--------------------------------|------|------|------|-------|------|-------|-------|-------|
| No                             | 2.34 | 3.39 | 5.13 | 8.87  | 3.02 | 7.36  | 11.83 | 30.78 |
| Yes                            | 3.73 | 5.96 | 4.90 | 0.00  | 2.78 | 6.54  | 12.89 | 26.23 |
| Chronic kidney disease         |      |      |      |       |      |       |       |       |
| No                             | 2.19 | 3.70 | 6.00 | 6.89  | 3.02 | 6.94  | 13.17 | 41.39 |
| Yes                            | 5.63 | 7.30 | 5.44 | 11.39 | 4.66 | 12.71 | 20.42 | 42.27 |
| HDL-C $\leq$ 50 mg/dL          |      |      |      |       |      |       |       |       |
| No                             | 1.45 | 3.71 | 5.53 | 9.18  | 3.06 | 6.03  | 13.48 | 38.87 |
| Yes                            | 3.24 | 4.54 | 6.34 | 7.79  | 3.21 | 9.24  | 16.66 | 45.66 |
| Triglycerides $\geq$ 150 mg/dL |      |      |      |       |      |       |       |       |
| No                             | 2.04 | 3.50 | 6.37 | 8.66  | 3.16 | 6.50  | 15.28 | 41.68 |
| Yes                            | 3.62 | 5.59 | 4.43 | 8.32  | 3.10 | 10.26 | 13.57 | 41.83 |
| LDL-C $\geq$ 130 mg/dL         |      |      |      |       |      |       |       |       |
| No                             | 2.53 | 3.99 | 5.97 | 9.94  | 3.36 | 7.95  | 14.68 | 42.43 |
| Yes                            | 2.27 | 4.41 | 5.64 | 5.11  | 2.69 | 7.09  | 15.19 | 39.74 |
| Lp(a) $\geq$ 50 mg/dL          |      |      |      |       |      |       |       |       |
| No                             | 2.51 | 3.77 | 5.73 | 7.22  | 2.88 | 8.60  | 14.99 | 41.47 |
| Yes                            | 2.16 | 5.36 | 6.30 | 13.77 | 4.24 | 4.45  | 14.35 | 42.61 |
| hsCRP $\geq$ 2 mg/L            |      |      |      |       |      |       |       |       |
| No                             | 2.01 | 3.70 | 5.53 | 5.71  | 2.54 | 5.87  | 14.41 | 39.26 |
| Yes                            | 2.98 | 4.53 | 6.19 | 12.63 | 3.89 | 9.27  | 15.23 | 45.20 |

Abbreviations: CHD (coronary heart disease); HDL-C (high-density lipoprotein cholesterol); LDL-C (low-density lipoprotein cholesterol); Lp(a) (lipoprotein (a)); hsCRP (high-sensitivity C-reactive protein).

Increased waist circumference is defined as  $\geq$ 90 cm for men or  $\geq$ 80 cm for women

**Supplementary Table 3.** Multivariable-adjusted hazard ratios (95% confidence interval) for the association of cardiovascular risk factors and incident atherosclerotic cardiovascular disease and all-cause mortality stratified by sex among those with coronary artery calcium 0 at baseline

|                                   | <b>Atherosclerotic Cardiovascular Disease</b> |                                   | <b>All-Cause Mortality</b>        |                                   |
|-----------------------------------|-----------------------------------------------|-----------------------------------|-----------------------------------|-----------------------------------|
|                                   | <b>Women</b>                                  | <b>Men</b>                        | <b>Women</b>                      | <b>Men</b>                        |
| Cigarette smoking status          |                                               |                                   |                                   |                                   |
| Never                             | 1.00 (ref)                                    | 1.00 (ref)                        | 1.00 (ref)                        | 1.00 (ref)                        |
| Former                            | 0.71<br>(0.40,1.27)                           | 1.56<br>(0.81,2.98)               | 0.95<br>(0.64,1.42)               | 1.15<br>(0.74,1.77)               |
| Current                           | 1.69<br>(0.89,3.22)                           | <b>2.65</b><br><b>(1.23,5.68)</b> | <b>2.75</b><br><b>(1.70,4.47)</b> | <b>2.82</b><br><b>(1.67,4.47)</b> |
| Diabetes mellitus                 | 1.45<br>(0.69,3.09)                           | 1.93<br>(0.94,3.99)               | 0.98<br>(0.57,1.69)               | 1.40<br>(0.83,2.38)               |
| Hypertension                      | 1.66<br>(0.98,2.80)                           | 1.60<br>(0.86,2.96)               | <b>1.52</b><br><b>(1.05,2.22)</b> | 1.32<br>(0.86,2.03)               |
| Aspirin use                       | 1.18<br>(0.65,2.15)                           | 1.03<br>(0.48,2.22)               | 0.70<br>(0.44,1.10)               | 0.96<br>(0.59,1.57)               |
| Time varying statin use           | 0.71<br>(0.41,1.24)                           | 0.95<br>(0.49,1.83)               | 0.88<br>(0.60,1.28)               | 0.70<br>(0.45,1.09)               |
| Waist circumference, per 10 cm    | 1.07<br>(0.91,1.25)                           | 1.12<br>(0.87,1.44)               | <b>1.16</b><br><b>(1.04,1.30)</b> | 0.99<br>(0.82,1.20)               |
| Family history of premature ASCVD | <b>1.69</b><br><b>(1.03,2.77)</b>             | 0.71<br>(0.32,1.60)               | 0.68<br>(0.43,1.09)               | 1.10<br>(0.66,1.85)               |
| Chronic kidney disease            | 0.97<br>(0.52,1.82)                           | 1.62<br>(0.79,3.29)               | 1.04<br>(0.69,1.56)               | 1.37<br>(0.87,2.17)               |
| HDL-C, per 10 mg/dL               | 0.88<br>(0.73,1.05)                           | 0.95<br>(0.71,1.28)               | 0.96<br>(0.85,1.08)               | 0.95<br>(0.79,1.15)               |
| Triglycerides, per 10 mg/dL       | 1.00<br>(0.96,1.04)                           | 0.99<br>(0.94,1.04)               | 0.97<br>(0.94,1.00)               | 1.01<br>(0.98,1.05)               |

|                     |                     |                     |                     |                     |
|---------------------|---------------------|---------------------|---------------------|---------------------|
| LDL-C, per 10 mg/dL | 1.01<br>(0.93,1.09) | 0.97<br>(0.88,1.07) | 0.95<br>(0.90,1.01) | 0.99<br>(0.93,1.06) |
| *Lp(a), per 5 mg/dL | 0.99<br>(0.33,2.96) | 1.18<br>(0.30,4.66) | 1.29<br>(0.58,2.90) | 1.03<br>(0.40,2.62) |
| *hsCRP, per mg/L    | 0.93<br>(0.75,1.16) | 1.06<br>(0.80,1.41) | 1.10<br>(0.94,1.29) | 1.19<br>(0.99,1.42) |

Abbreviations: SBP (systolic blood pressure); CHD (coronary heart disease); HDL-C (high-density lipoprotein cholesterol); LDL-C (low-density lipoprotein cholesterol); Lp(a) (lipoprotein (a)); hsCRP (high-sensitivity C-reactive protein)

\*Lp(a) and hsCRP are log-transformed

Model is adjusted for age, sex, race/ethnicity, education, presence of healthcare insurance, and all listed risk factors

**BOLDED** items are significant statistically significant ( $P < 0.05$ )

**Supplementary Table 4.** Multivariable-adjusted hazard ratios (95% confidence interval) for the association of cardiovascular risk factors and incident coronary heart disease and stroke among those with coronary artery calcium 0 at baseline

|                                   | <b>Coronary Heart Disease</b> | <b>Stroke</b>           |
|-----------------------------------|-------------------------------|-------------------------|
| Cigarette smoking status          |                               |                         |
| Never                             | 1.00 (ref)                    | 1.00 (ref)              |
| Former                            | 1.19 (0.68,2.06)              | 0.98 (0.55,1.73)        |
| Current                           | <b>2.19 (1.14,4.17)</b>       | 1.85 (0.93,3.71)        |
| Diabetes mellitus                 | 1.77 (0.89,3.51)              | 1.56 (0.74,3.25)        |
| Hypertension                      | 1.33 (0.78,2.27)              | <b>1.91 (1.09,3.35)</b> |
| Aspirin use                       | 0.79 (0.40,1.59)              | 1.62 (0.89,2.94)        |
| Time varying statin use           | 0.95 (0.55,1.64)              | 0.70 (0.38,1.30)        |
| Waist circumference, per 10 cm    | 1.14 (0.96,1.36)              | 0.98 (0.80,1.19)        |
| Family history of premature ASCVD | 1.25 (0.72,2.18)              | 1.39 (0.78,2.47)        |
| Chronic kidney disease            | 1.23 (0.66,2.29)              | 1.27 (0.67,2.43)        |
| HDL-C, per 10 mg/dL               | 1.01 (0.83,1.23)              | 0.86 (0.70,1.07)        |
| Triglycerides, per 10 mg/dL       | 1.01 (0.97,1.05)              | 0.98 (0.94,1.03)        |
| LDL-C, per 10 mg/dL               | 1.00 (0.92,1.09)              | 0.97 (0.89,1.05)        |
| *Lp(a), per 5 mg/dL               | 0.71 (0.23,2.23)              | 1.96 (0.59,6.52)        |
| *hsCRP, per mg/L                  | 0.96 (0.76,1.21)              | 1.03 (0.80,1.31)        |

Abbreviations: SBP (systolic blood pressure); CHD (coronary heart disease); HDL-C (high-density lipoprotein cholesterol); LDL-C (low-density lipoprotein cholesterol); Lp(a) (lipoprotein (a)); hsCRP (high-sensitivity C-reactive protein).

\*Lp(a) and hsCRP are log-transformed

Model is adjusted for age, sex, race/ethnicity, education, presence of healthcare insurance, and all listed risk factors

**BOLDED** items are significant statistically significant (P < 0.05)
